# Supplementary material for: Genetic interaction between profilin and myosin II reveals a potential role for myosin II in actin filament disassembly in vivo
Source: bioRxiv or medRxiv preprint supplement (doi:10.1101/2020.04.03.023705), 2020-04-04

# Supplement S1

24°C

**A**

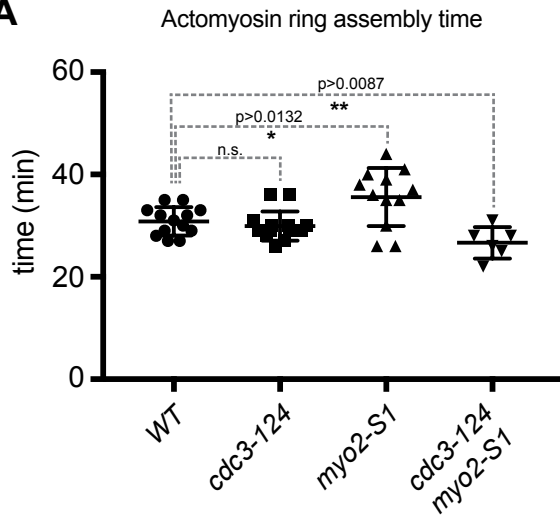

24°C

**B**

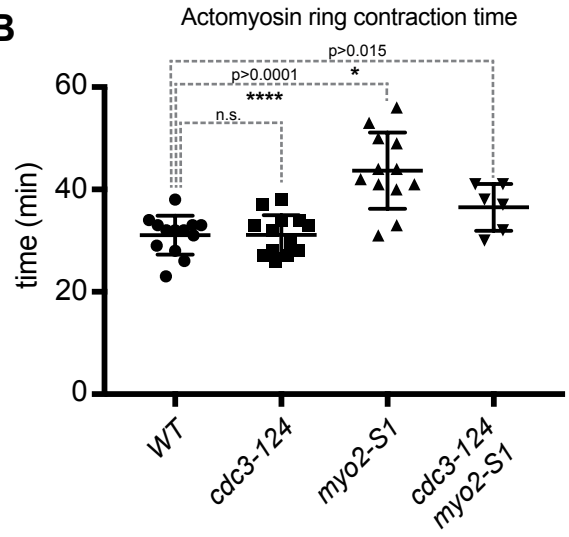

# Supplement S2

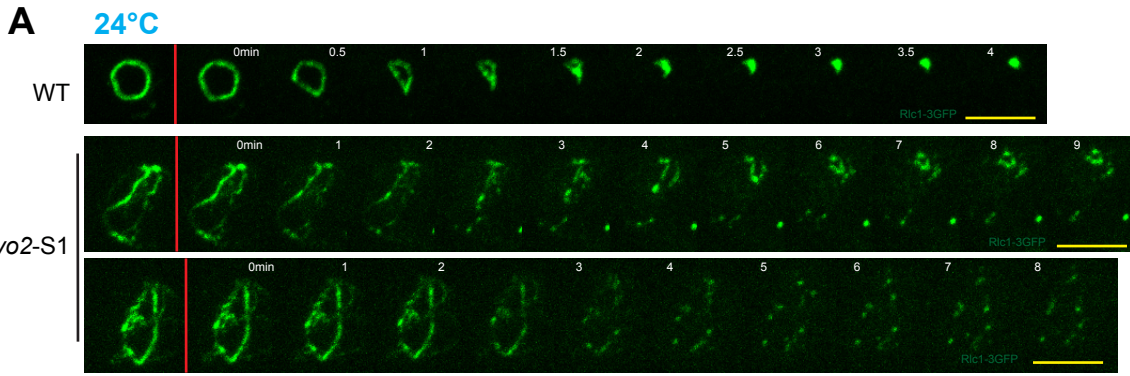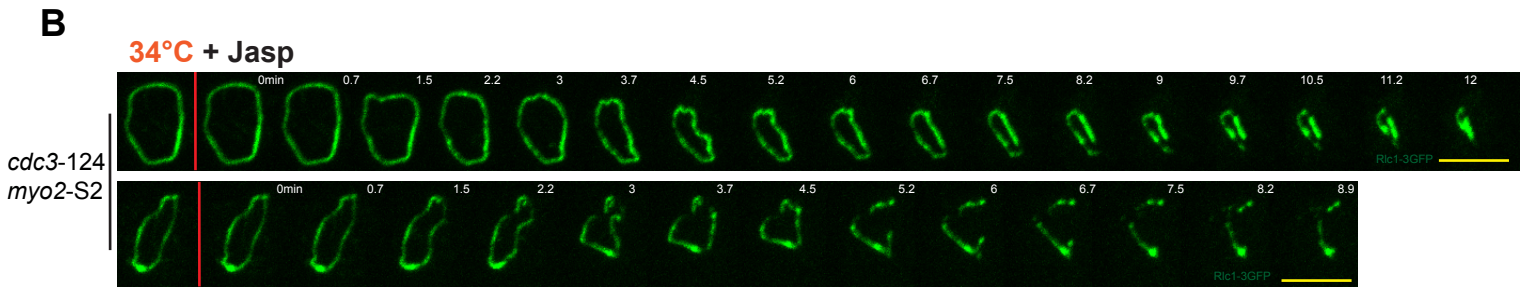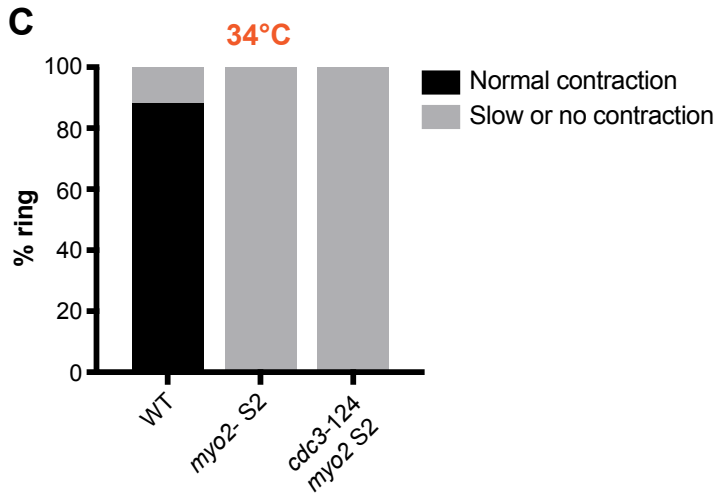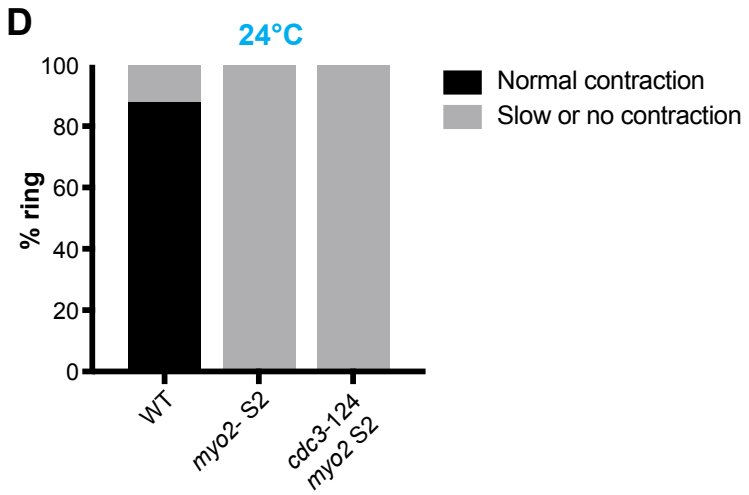

Supplement: Supplementary file [file media-1.pdf]
